# Supplementary material
Source: PubMed Central journal article supplement (PMC8031294)
Supplement: JCH-19-731-s002.pdf [file JCH-19-731-s002.pdf]

**Supplementary Table S1.** Linear mixed model estimates for B-D difference of diastolic blood pressure

| Variable                                                | Adjusted estimates<br>(mmHg) | 95%CI        | P value |
|---------------------------------------------------------|------------------------------|--------------|---------|
| Model 1                                                 |                              |              |         |
| Time after bathing $\leq$ 120 min.                      | -2.51                        | -3.70, -1.32 | <0.001  |
| Drinking                                                | -4.58                        | -6.29, -2.87 | <0.001  |
| Model 2                                                 |                              |              |         |
| Time after bathing $\leq$ 120 min.                      | -2.67                        | -4.02, -1.33 | <0.001  |
| Drinking                                                | -5.07                        | -7.61, -2.53 | <0.001  |
| Time after bathing $\leq$ 120 min.<br>$\times$ Drinking | 0.87                         | -2.47, 4.20  | 0.610   |

Adjusted for age, sex, BMI, dyslipidemia, diabetes mellitus, chronic kidney disease, history of cardiovascular disease, number of antihypertensive drugs, medication after breakfast, medication after dinner.
